# Supplementary material for: X–N Charge density analysis of the hydrogen bonding motif in 1-(2-hydroxy-5-nitrophenyl)ethanoneElectronic supplementary information (ESI) available: multipole population coefficients and pseudoatom parameterization. See http://www.rsc.org/suppdata/ob/b2/b211683a/
Source: Royal Society of Chemistry journal article supplement (doi:10.1039/b211683a), 2003-03-03
Supplement: b211683a.doc [file b211683a.doc]

---- Pseudoatom parameterization ----

exponents are tabulated in Bohr^-1

Atom no. label kappaHF l=0 l=1 l=2 l=3 l=4

1 O(1) 0.993 kappa(l): 0.903 0.903 0.903 0.903 0.903

n(l) 2 2 2 3 4

zeta(l) 4.466 4.466 4.466 4.466 4.466

kappa(l)*zeta(l) 4.034 4.034 4.034 4.034 4.034

No. of sym. related atoms: 0 Seq. no.s:

CONFIGURATION: 1S 2 2S 2 2P 4

2 O(2) 0.993 kappa(l): 0.903 0.903 0.903 0.903 0.903

n(l) 2 2 2 3 4

zeta(l) 4.466 4.466 4.466 4.466 4.466

kappa(l)*zeta(l) 4.034 4.034 4.034 4.034 4.034

No. of sym. related atoms: 0 Seq. no.s:

CONFIGURATION: 1S 2 2S 2 2P 4

3 O(3) 1.000 kappa(l): 1.061 1.061 1.061 1.061 1.061

n(l) 2 2 2 3 4

zeta(l) 4.466 4.466 4.466 4.466 4.466

kappa(l)*zeta(l) 4.737 4.737 4.737 4.737 4.737

No. of sym. related atoms: 0 Seq. no.s:

CONFIGURATION: 1S 2 2S 2 2P 4

4 O(4) 1.000 kappa(l): 1.061 1.061 1.061 1.061 1.061

n(l) 2 2 2 3 4

zeta(l) 4.466 4.466 4.466 4.466 4.466

kappa(l)*zeta(l) 4.737 4.737 4.737 4.737 4.737

No. of sym. related atoms: 0 Seq. no.s:

CONFIGURATION: 1S 2 2S 2 2P 4

5 N(1) 0.980 kappa(l): 0.841 0.841 0.841 0.841 0.841

n(l) 2 2 2 3 4

zeta(l) 3.839 3.839 3.839 3.839 3.839

kappa(l)*zeta(l) 3.229 3.229 3.229 3.229 3.229

No. of sym. related atoms: 0 Seq. no.s:

CONFIGURATION: 1S 2 2S 2 2P 3

6 C(1) 1.014 kappa(l): 0.919 0.919 0.919 0.919

n(l) 2 2 2 3

zeta(l) 3.176 3.176 3.176 3.176

kappa(l)*zeta(l) 2.919 2.919 2.919 2.919

No. of sym. related atoms: 0 Seq. no.s:

CONFIGURATION: 1S 2 2S 2 2P 2

7 C(2) 1.014 kappa(l): 0.919 0.919 0.919 0.919

n(l) 2 2 2 3

zeta(l) 3.176 3.176 3.176 3.176

kappa(l)*zeta(l) 2.919 2.919 2.919 2.919

No. of sym. related atoms: 0 Seq. no.s:

CONFIGURATION: 1S 2 2S 2 2P 2

8 C(3) 1.014 kappa(l): 0.919 0.919 0.919 0.919

n(l) 2 2 2 3

zeta(l) 3.176 3.176 3.176 3.176

kappa(l)*zeta(l) 2.919 2.919 2.919 2.919

No. of sym. related atoms: 0 Seq. no.s:

CONFIGURATION: 1S 2 2S 2 2P 2

9 C(4) 1.014 kappa(l): 0.919 0.919 0.919 0.919

n(l) 2 2 2 3

zeta(l) 3.176 3.176 3.176 3.176

kappa(l)*zeta(l) 2.919 2.919 2.919 2.919

No. of sym. related atoms: 0 Seq. no.s:

CONFIGURATION: 1S 2 2S 2 2P 2

10 C(5) 1.014 kappa(l): 0.919 0.919 0.919 0.919

n(l) 2 2 2 3

zeta(l) 3.176 3.176 3.176 3.176

kappa(l)*zeta(l) 2.919 2.919 2.919 2.919

No. of sym. related atoms: 0 Seq. no.s:

CONFIGURATION: 1S 2 2S 2 2P 2

11 C(6) 1.014 kappa(l): 0.919 0.919 0.919 0.919

n(l) 2 2 2 3

zeta(l) 3.176 3.176 3.176 3.176

kappa(l)*zeta(l) 2.919 2.919 2.919 2.919

No. of sym. related atoms: 0 Seq. no.s:

CONFIGURATION: 1S 2 2S 2 2P 2

12 C(7) 1.014 kappa(l): 0.919 0.919 0.919 0.919

n(l) 2 2 2 3

zeta(l) 3.176 3.176 3.176 3.176

kappa(l)*zeta(l) 2.919 2.919 2.919 2.919

No. of sym. related atoms: 0 Seq. no.s:

CONFIGURATION: 1S 2 2S 2 2P 2

13 C(8) 1.014 kappa(l): 0.919 0.919 0.919 0.919

n(l) 2 2 2 3

zeta(l) 3.176 3.176 3.176 3.176

kappa(l)*zeta(l) 2.919 2.919 2.919 2.919

No. of sym. related atoms: 0 Seq. no.s:

CONFIGURATION: 1S 2 2S 2 2P 2

14 H(1) 1.200 kappa(l): 1.200 1.200 1.200

n(l) 0 1 2

zeta(l) 2.000 2.000 2.000

kappa(l)*zeta(l) 2.400 2.400 2.400

No. of sym. related atoms: 0 Seq. no.s:

CONFIGURATION: 1S 1

15 H(3) 1.200 kappa(l): 1.200 1.200

n(l) 0 1

zeta(l) 2.000 2.000

kappa(l)*zeta(l) 2.400 2.400

No. of sym. related atoms: 0 Seq. no.s:

CONFIGURATION: 1S 1

16 H(5) 1.200 kappa(l): 1.200 1.200

n(l) 0 1

zeta(l) 2.000 2.000

kappa(l)*zeta(l) 2.400 2.400

No. of sym. related atoms: 0 Seq. no.s:

CONFIGURATION: 1S 1

17 H(6) 1.200 kappa(l): 1.200 1.200

n(l) 0 1

zeta(l) 2.000 2.000

kappa(l)*zeta(l) 2.400 2.400

No. of sym. related atoms: 0 Seq. no.s:

CONFIGURATION: 1S 1

18 H(8A) 1.200 kappa(l): 1.200 1.200

n(l) 0 1

zeta(l) 2.000 2.000

kappa(l)*zeta(l) 2.400 2.400

No. of sym. related atoms: 0 Seq. no.s:

CONFIGURATION: 1S 1

19 H(8B) 1.200 kappa(l): 1.200 1.200

n(l) 0 1

zeta(l) 2.000 2.000

kappa(l)*zeta(l) 2.400 2.400

No. of sym. related atoms: 0 Seq. no.s:

CONFIGURATION: 1S 1

20 H(8C) 1.200 kappa(l): 1.200 1.200

n(l) 0 1

zeta(l) 2.000 2.000

kappa(l)*zeta(l) 2.400 2.400

No. of sym. related atoms: 0 Seq. no.s:

CONFIGURATION: 1S 1

Populations of pseudoatoms in global frame:

O(1) kappa1: 0.9934 kappa2: 0.9034 Pc: 2 Pv: 6.2844

m=-4 m=-3 m=-2 m=-1 m= 0 m=+1 m=+2 m=+3 m=+4

0.0000

0.0132 0.0893 -0.1118

-0.0277 0.0048 0.0689 -0.0172 0.0386

0.0477 0.0374 -0.0176 0.0626 0.0014 0.0388 -0.0705

0.0000 0.0000 0.0000 0.0000 0.0000 0.0000 0.0000 0.0000 0.0000

O(2) kappa1: 0.9934 kappa2: 0.9034 Pc: 2 Pv: 6.2341

m=-4 m=-3 m=-2 m=-1 m= 0 m=+1 m=+2 m=+3 m=+4

0.0000

-0.0332 0.0695 -0.0965

-0.0960 0.1268 -0.0531 -0.0568 0.0515

0.0532 0.0257 0.0113 -0.0095 0.0213 0.0558 -0.0057

0.0000 0.0000 0.0000 0.0000 0.0000 0.0000 0.0000 0.0000 0.0000

O(3) kappa1: 1.0001 kappa2: 1.0607 Pc: 2 Pv: 6.2020

m=-4 m=-3 m=-2 m=-1 m= 0 m=+1 m=+2 m=+3 m=+4

0.0000

0.0453 0.0375 -0.0214

0.0775 0.0106 -0.0744 0.0210 0.1096

0.0057 0.0174 -0.0125 0.0044 -0.0114 0.0207 -0.0236

0.0000 0.0000 0.0000 0.0000 0.0000 0.0000 0.0000 0.0000 0.0000

O(4) kappa1: 1.0001 kappa2: 1.0607 Pc: 2 Pv: 6.2020

m=-4 m=-3 m=-2 m=-1 m= 0 m=+1 m=+2 m=+3 m=+4

0.0000

-0.0145 0.0005 0.0609

0.0558 0.0999 -0.0363 0.0346 -0.0903

0.0148 0.0110 -0.0071 0.0002 0.0258 0.0181 -0.0156

0.0000 0.0000 0.0000 0.0000 0.0000 0.0000 0.0000 0.0000 0.0000

N(1) kappa1: 0.9800 kappa2: 0.8409 Pc: 2 Pv: 5.2919

m=-4 m=-3 m=-2 m=-1 m= 0 m=+1 m=+2 m=+3 m=+4

0.0000

-0.0031 -0.0450 0.0754

0.0064 0.2048 -0.1034 -0.0751 0.0457

-0.2563 -0.2151 0.0733 0.1125 -0.0474 -0.1536 0.2694

-0.0175 0.0046 -0.0924 -0.1082 0.0025 -0.0246 -0.0124 0.0447 -0.0180

C(1) kappa1: 1.0136 kappa2: 0.9189 Pc: 2 Pv: 4.0611

m=-4 m=-3 m=-2 m=-1 m= 0 m=+1 m=+2 m=+3 m=+4

0.0000

0.0205 0.0808 -0.0123

-0.0391 0.1198 -0.1561 -0.0238 0.0334

-0.2079 -0.1524 0.0476 0.1343 0.0106 -0.1197 0.2563

C(2) kappa1: 1.0136 kappa2: 0.9189 Pc: 2 Pv: 3.9174

m=-4 m=-3 m=-2 m=-1 m= 0 m=+1 m=+2 m=+3 m=+4

0.0000

0.0339 0.0791 -0.0773

0.0036 0.0830 -0.0529 0.0241 0.0233

0.1392 0.0705 -0.0455 0.0140 0.0762 0.1520 -0.2006

C(3) kappa1: 1.0136 kappa2: 0.9189 Pc: 2 Pv: 4.0591

m=-4 m=-3 m=-2 m=-1 m= 0 m=+1 m=+2 m=+3 m=+4

0.0000

0.0100 -0.0087 -0.0378

0.0056 0.1211 -0.1378 -0.0519 0.0323

-0.0931 -0.1125 0.0395 0.0538 -0.0214 -0.0923 0.2700

C(4) kappa1: 1.0136 kappa2: 0.9189 Pc: 2 Pv: 3.8912

m=-4 m=-3 m=-2 m=-1 m= 0 m=+1 m=+2 m=+3 m=+4

0.0000

-0.0957 -0.0275 -0.1271

-0.1105 0.0627 -0.0342 -0.1044 0.0879

0.1338 0.1481 -0.0403 0.0074 0.0131 0.1158 -0.1734

C(5) kappa1: 1.0136 kappa2: 0.9189 Pc: 2 Pv: 4.0591

m=-4 m=-3 m=-2 m=-1 m= 0 m=+1 m=+2 m=+3 m=+4

0.0000

-0.0239 -0.0314 0.0069

0.0214 0.1276 -0.1403 -0.0311 0.0094

-0.1789 -0.0880 0.0282 0.0192 -0.0412 -0.1486 0.2078

C(6) kappa1: 1.0136 kappa2: 0.9189 Pc: 2 Pv: 4.0591

m=-4 m=-3 m=-2 m=-1 m= 0 m=+1 m=+2 m=+3 m=+4

0.0000

-0.0119 0.0108 0.0367

0.0192 0.1085 -0.1541 -0.0234 0.0375

0.1409 0.1126 -0.0172 -0.0100 0.0482 0.1236 -0.2391

C(7) kappa1: 1.0136 kappa2: 0.9189 Pc: 2 Pv: 3.9308

m=-4 m=-3 m=-2 m=-1 m= 0 m=+1 m=+2 m=+3 m=+4

0.0000

-0.1054 0.0059 -0.0978

0.0920 0.2421 -0.2210 -0.0404 0.0905

-0.2281 -0.1051 0.0394 0.0187 0.0105 -0.2012 0.2961

C(8) kappa1: 1.0136 kappa2: 0.9189 Pc: 2 Pv: 4.3319

m=-4 m=-3 m=-2 m=-1 m= 0 m=+1 m=+2 m=+3 m=+4

0.0000

-0.0184 -0.0053 0.0850

0.0331 0.0146 -0.0311 0.0112 -0.0538

0.0940 -0.0069 -0.0331 0.1049 0.1467 0.3123 -0.0936

H(1) kappa1: 1.2000 kappa2: 1.2000 Pc: 0 Pv: 1.0133

m=-4 m=-3 m=-2 m=-1 m= 0 m=+1 m=+2 m=+3 m=+4

0.0000

0.2232 0.2714 -0.2207

-0.1592 0.1190 -0.0776 -0.1687 -0.0733

H(3) kappa1: 1.2000 kappa2: 1.2000 Pc: 0 Pv: 0.7511

m=-4 m=-3 m=-2 m=-1 m= 0 m=+1 m=+2 m=+3 m=+4

0.0000

0.0138 0.0269 -0.1748

H(5) kappa1: 1.2000 kappa2: 1.2000 Pc: 0 Pv: 0.7511

m=-4 m=-3 m=-2 m=-1 m= 0 m=+1 m=+2 m=+3 m=+4

0.0000

-0.1495 -0.0834 0.0466

H(6) kappa1: 1.2000 kappa2: 1.2000 Pc: 0 Pv: 0.7511

m=-4 m=-3 m=-2 m=-1 m= 0 m=+1 m=+2 m=+3 m=+4

0.0000

-0.0310 -0.0203 0.1735

H(8A) kappa1: 1.2000 kappa2: 1.2000 Pc: 0 Pv: 0.7366

m=-4 m=-3 m=-2 m=-1 m= 0 m=+1 m=+2 m=+3 m=+4

0.0000

0.0957 0.0496 -0.0137

H(8B) kappa1: 1.2000 kappa2: 1.2000 Pc: 0 Pv: 0.7366

m=-4 m=-3 m=-2 m=-1 m= 0 m=+1 m=+2 m=+3 m=+4

0.0000

0.0024 -0.0951 -0.0525

H(8C) kappa1: 1.2000 kappa2: 1.2000 Pc: 0 Pv: 0.7366

m=-4 m=-3 m=-2 m=-1 m= 0 m=+1 m=+2 m=+3 m=+4

0.0000

-0.0755 0.0634 -0.0458

Ring (3, +1) critical point data

| Intra- | RCP | bcp (eÅ-3) | 2bcp (eÅ-5) | x | y | z |
| --- | --- | --- | --- | --- | --- | --- |
|  | 1 | 0.09(1) | 3.41(1) | 4.497 | 2.203 | 1.221 |
|  | 2 | 0.07(1) | 3.41(1) | 3.943 | -0.062 | 0.415 |
|  | 3 | 0.08(1) | 2.05(1) | 5.014 | 4.367 | 2.414 |
|  | 4 | 0.04(1) | 1.01(1) | 6.442 | 0.886 | 0.171 |
| Inter- |  |  |  |  |  |  |
|  | 5 | 0.02(1) | 0.42(1) | 3.235 | -2.102 | -0.584 |
|  | 6 | 0.01(1) | 0.40(1) | 9.543 | 2.855 | 2.533 |
|  | 7 | 0.01(1) | 0.20(1) | 7.546 | 1.618 | -0.222 |
